CORRECTION

# Correction: Protection provided by vaccination, booster doses and previous infection against covid-19 infection, hospitalisation or death over time in Czechia

The *PLOS ONE* Staff

The publisher apologizes for the error. There is an error in affiliation 11 for author Jan Trnka. The correct affiliation 11 is: Department of Biochemistry, Cell and Molecular Biology, Third Faculty of Medicine, Charles University, Ruská 87, 10000 Praha 10, Czech Republic.

## Reference

1. Berec L, Šmíd M, Příbylová L, Májek O, Pavlík T, Jarkovský J, et al. (2022) Protection provided by vaccination, booster doses and previous infection against covid-19 infection, hospitalisation or death over time in Czechia. PLoS ONE 17(7): e0270801. <https://doi.org/10.1371/journal.pone.0270801> PMID: 35802590

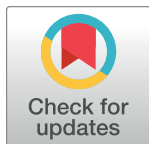

## OPEN ACCESS

**Citation:** The *PLOS ONE* Staff (2023) Correction: Protection provided by vaccination, booster doses and previous infection against covid-19 infection, hospitalisation or death over time in Czechia. PLoS ONE 18(11): e0295159. <https://doi.org/10.1371/journal.pone.0295159>

**Published:** November 28, 2023

**Copyright:** © 2023 The PLOS ONE Staff. This is an open access article distributed under the terms of the [Creative Commons Attribution License](https://creativecommons.org/licenses/by/4.0/), which permits unrestricted use, distribution, and reproduction in any medium, provided the original author and source are credited.
